# Supplementary material for: PathoGenomics of Multidrug-Resistant Escherichia coli from Bloodstream Infections in South Africa
Source: Research Square preprint supplement (doi:10.21203/rs.3.rs-7050534/v1), 2025-07-21
Supplement: Supplementary file 1 [file 7eefb0aa9c80c6eae1801b94.docx]

**Table S1.** Demographic characteristic of patients with BSIs caused by *E. coli*

| **Isolate ID** | **Sample** | **Hospital/Location** | **Department / ward** | **Gender** |
| --- | --- | --- | --- | --- |
| E3 | Blood | Tertiary | Casualty | F |
| E4 | Blood | Regional | Medical ward | F |
| E13 | Blood | Regional | Emergency department | M |
| E17 | Blood | Regional | Surgical intensive care unit | M |
| E18 | Blood | Regional | Paediatric ward | F |
| E21 | Blood | Tertiary | Surgical ward | F |
| E25 | Blood | Regional | Intensive care unit | M |
| E26 | Blood | Regional | Surgical ward | F |
| AE1 | Blood | Regional | Intensive care unit | M |
| S7 | Blood | Regional | Orthopaedic outpatient department | F |
| S18 | Blood | Regional | Extension ward | M |
| K41 | Blood | Tertiary | Renal unit | F |

**Table S2**. Genome and assembly characteristics of sequenced *E. coli* isolates

| **Isolate ID**  **[MLST]** | **Accession no.** | **Department** | **Sex*** | **Size (Mb)** | **GC%** | **Contigs** | **No. of RNAs** | **No of coding Sequences** | **N50** | **L50** |
| --- | --- | --- | --- | --- | --- | --- | --- | --- | --- | --- |
| E3 [ST59] | JADQTC000000000 | Casualty | M | 5.8 | 50.3 | 1787 | 83 | 5893 | 7407 | 268 |
| E4 [ST131] | JADIWD000000000 | Medical ward | F | 5.2 | 50.7 | 152 | 87 | 5278 | 227276 | 9 |
| E13 [ST69] | JADIWB000000000 | Emergency department | M | 6.1 | 50.3 | 796 | 102 | 6748 | 50167 | 29 |
| E17 [ST59] | JADIWF000000000 | Surgical intensive care unit | M | 5.0 | 50.6 | 286 | 90 | 5228 | 55396 | 27 |
| E18 [ST10] | JADIWC000000000 | Paediatric ward | F | 5.3 | 50.5 | 313 | 103 | 5584 | 103855 | 18 |
| E21 [ST155] | JADIWE000000000 | Surgical ward | F | 4.8 | 50.8 | 131 | 78 | 4847 | 188847 | 10 |
| E25 [ST131] | JADIWG000000000 | Intensive care unit | M | 5.1 | 50.6 | 182 | 93 | 5161 | 126511 | 12 |
| E26 [ST131] | JADIWH000000000 | Surgical ward | F | 5.1 | 50.6 | 182 | 93 | 5161 | 126511 | 12 |
| AE1 [ST38] | JADIWA000000000 | Intensive care unit | M | 5.3 | 50.5 | 246 | 96 | 5413 | 131133 | 13 |
| S7 [ST10] | JADQTA000000000 | Orthopaedic outpatient department | F | 5.0 | 50.8 | 263 | 93 | 5239 | 73221 | 22 |
| S18 [ST131] | JADQSZ000000000 | Extension ward | M | 5.1 | 50.8 | 114 | 84 | 5163 | 253784 | 8 |
| K41 [ST69] | JADQTB000000000 | Renal unit | F | 5.0 | 50.6 | 234 | 69 | 5066 | 91587 | 16 |

**Note**: N50 = smallest contig of the size-sorted contigs that make up at least 50% of the respective assembly; L50 = number of contigs that make up at least 50% of the respective total assembly length.

**Table S3:** Antibiotic susceptibility profiles of *E. coli* isolates from bloodstream infections

| **ID** | **MLST** | **Ward type** | **Antibiotic resistance profile** | | | | | | | | | | | | | | | | | | | | |
| --- | --- | --- | --- | --- | --- | --- | --- | --- | --- | --- | --- | --- | --- | --- | --- | --- | --- | --- | --- | --- | --- | --- | --- |
| AMP | AMC | TZP | CTX | CAZ | CRO | FEP | LEX | FOX | IMP | MEM | NAL | CIP | GEN | AMK | TGC | TET | CHL | SXT | AZM |
| E3 | ST131 | Casualty | R | R | S | R | R | R | R | R | R | S | S | R | R | R | R | S | S | S | R | R |
| E4 | ST131 | Med  ward | R | R | I | R | R | R | R | R | R | S | I | R | R | R | R | S | R | S | R | R |
| E13 | ST69 | Emerg dept | R | R | R | R | R | R | R | R | 1 | S | S | R | R | R | R | S | R | S | R | R |
| E17 | ST59 | SICU | R | R | S | R | R | R | R | R | R | R | R | R | S | S | S | S | R | S | S | R |
| E21 | ST155 | Surg  ward | R | R | S | R | R | R | I | R | R | S | S | R | R | S | S | S | R | R | S | R |
| E18 | ST10 | Paed ward | R | R | S | R | R | R | R | R | R | I | S | R | S | S | S | S | R | R | R | R |
| E25 | ST69 | ICU | S | S | I | S | S | S | S | S | S | S | S | I | S | R | R | S | S | S | R | R |
| E26 | ST131 | Surg  ward | R | R | R | R | R | R | R | R | R | S | S | R | R | R | R | S | S | S | S | R |
| AE1 | ST38 | ICU | R | R | S | R | R | R | S | S | R | S | S | S | I | R | R | S | R | I | R | S |
| S7 | ST10 | OOPD | R | R | R | R | R | R | R | S | R | S | S | R | R | R | R | S | R | S | R | S |
| S18 | ST131 | Extn ward | R | R | R | R | R | R | R | S | R | S | S | R | R | R | R | R | R | R | R | S |
| K41 | ST69 | Renal unit | S | R | R | R | R | R | R | S | S | S | S | S | S | R | R | S | R | I | R | S |

Note: AMP, ampicillin; AMC, amoxicillin and clavulanate combination; TZP, piperacillin-tazobactam; CTX, cefotaxime; CAZ, ceftazidime; CRO, ceftriaxone; FEP, cefepime; IMP; imipenem, MEM; meropenem; FOX, cefoxitin; CIP, ciprofloxacin; GEN, gentamicin; AMK, amikacin; TGC, tigecycline; TET, tetracycline, CHL, chloramphenicol; SXT, trimethoprim-sulfamethoxazole; AZM, azythromycin. R, resistant; I, intermediate; S, susceptible; M, male; F, female; Med ward, medical ward; Surg ICU, Surg ward; surgical ward, surgical intensive care unit; ICU, intensive care unit; Extn; extension ward, Emerg dept, emergency department; Paed ward, paediatric ward; OOPD, orthopedic out-patient department.

Table S4. MREs associated with antibiotic resistance genes in the *E. coli* strains

| **Sample ID** | **Contig** | **Synteny of resistance genes and MREs** | **Plasmid/chromosomal sequence with closest nucleotide homology (accession number)** |
| --- | --- | --- | --- |
| S18 | 43 | *mph(A):*IS*6100*::*sul1*:*qacE*:*aadA5*:*dfrA17*:*IntI1* | *E. coli* strain, plasmid p1-S1-CAM-04-C, complete sequence (CP145701.1) |
| 47 | transposase:*tet(A):tetR(A):*relaxase:*aph(6)-Id:aph(3'')-Ib*:*sul2* | *E. coli* strain SCU-103 plasmid pSCU-103-1, complete sequence (CP054458.1) |
| 46 | repA:incFII:IS*1*:*bla*TEM-1B:recombinase | *E. coli* O25b:H4-ST131 plasmid pMRY09-597ECO_1 MRY09-597, complete AP018458.1 |
| S7 | 69 | *tet(A):tetR(A*):relaxase:Tn3:recombinase:incFII | *E. coli* strain RHB03-C12 plasmid pRHB03-C12_3, complete sequence (CP058033.1) |
| 96 | *aph(3'')-Ib:sul2::*IS*91:aph(6)-Id:aph(3)-Ib:dfrA14* | *E. coli* strain STEC413 plasmid pSTEC413, complete sequence (CP060106.1) |
| K41 | 146 | *aph(6)-Id: aph(3'')-Ib:sul2* | *S. enterica* strain PNUSAS224101 plasmid pPNUSAS224101_1, (CP110543.1) |
| 151 | *mph(A):tet(A)* | *E. coli* strain GN05056 plasmid unnamed2, (CP147531.1) |
| 152 | *dfrA12:aadA2:qacE:sul1* | *E. coli* strain R2 plasmid pR2-1030-1, (CP107189.1) |
| 135 | *tet(A):tetR(A):*relaxase:Tn3 | *E. coli* strain EC190486 plasmid pEC190486_1_NDM5, (CP143093.1) |
| 163 | IS*3*:*aac(3)-IIe* | *E. coli* strain EC_01 plasmid pEBM1, complete sequence (CP120235.2) |
| E25 | 67 | *mph(A):tetR*:IS6100:*IntI*1:*dfrA12:ant(3'')-Ia:qacE:sul1:* | *E. coli* strain B17EC0426 plasmid pB17EC0426-3, complete sequence (CP088697.1) |
| E18 | 57 | relaxase::IS*91*:*aph(6)-Id:aph(3')-Ia:dfrA14:sul2*:IncI1:::*bla*TEM-1:recombinase:Tn3 | *E. coli* strain E17EC0085 plasmid pE17EC0085-3, complete sequence CP088489.1 |
| 111 | *sul1:qacE:dfrA7*:*IntI*1::IS*6* | *S. enterica*, plasmid pHCM1 complete sequence (CP029645.1) |
| E13 | 116 | *aph(6)-Id:aph(3'')-Ib:sul2*::::*mobA:aph(3')-Ia* | *S. enterica* subsp. enterica serovar Typhimurium plasmid Pnuc, (KU852461.1) |
| 245 | IS*1*:*aadA5:dfrA17*:*IntI*1 | *E. coli* strain SCU-482 plasmid pSCU-482-1, complete sequence (CP053248.1) |
| 166 | IS*1:tet(R):tet(B):tetC*:IS*4*:IS*1* | *E. coli* plasmid p2, complete sequence (MT077881.1) |
| E4 | 44 | IS*Ec9*:*blaCTX-M-15*::Tn3 | *E. coli* strain 5-1 chromosome, complete genome (CP089445.1) |
| 60 | *sul2:aph(3'')-Ib:aph(6)-Id*:IS*91*:*bla*TEM-1 | *E. coli* strain LA041 plasmid pLAO23, complete sequence (OP242256.1) |
| 61 | *catB*:*bla*OXA-1:*aac(6')-Ib-cr5* | *E. coli* strain 5-1 chromosome, complete genome (CP089445.1) |
| E3 | 1000 | *dfrA17:aadA5* | *E. coli* strain KE40 plasmid unnamed1, complete sequence (CP141101.1) |
| AE1 | 65 | *dfrA7:qacE:sul1:::recombinase:merE:merD:merC:merP:merT* | *Shigella flexneri* strain FDAARGOS_714 chromosome (CP055124.1) |
| 100 | *bla*OXA-1:*aadA1* | *E. coli* strain SCU-397 plasmid pSCU-397-2 (CP054830.1) |
| E26 | 35 | *aph(3'')-Ib:sul2*::IS*91*:*aph(6)-Id:aph(3'')-Ib:sul2* | *E. coli* E034 plasmid pE034_IMP6 DNA, complete sequence (AP022355.1) |
| 51 | *IncFII::CPBP:pemI:pemK:bla*TEM-1*:*IS*6* | *E. coli* strain Z1323PEC0011 plasmid pZ1323PEC0011-2, complete sequence ([CP148278.1](https://www.ncbi.nlm.nih.gov/nucleotide/CP148278.1?report=genbank&log$=nuclalign&blast_rank=1&RID=68V3FD19014)) |

**Table S5**. Virulence factors detected in *E. coli* isolates

| **Isolate ID** | **Adherence** | **Capsule** | **Iron uptake** | **toxins** | **Invasion** | **Serum**  **resistance** | **Tellurium resistance** | **Heat resistance** | **Autotransporter** | **Secretion system** | **Pathogenicity**  **score** |
| --- | --- | --- | --- | --- | --- | --- | --- | --- | --- | --- | --- |
| E3  (ST131) | *papA, papC, yfcV, iha, ompT, fael* | *kpsE, kpsMII_K24* | *sitA, irp2, fyuA, iucC, iutA,, chuA* | *senB, cnf1, nlpI,* *astA* | *ibeA, tia* | *traT* |  | *hra* | *vat, sat, pic* | *aaiA, vgrG, aatA, aec* | 0.923 |
| E4  (ST131) | *YfcV, papA, papC, ompT, iha, fimH, papA_F43* | *kpsMII_K5, kpsE* | *iutA, iucC, irp2, fyuA, chuA* | *SenB, cnf1,* *nlpI, astA* | *ibeA, tia* | *iss, traT* | *terC* | *hra* | *sat, vat, pic* | *aaiA, aatA, vgrG, aec* | 0.928 |
| E26  (ST131) | *fimH, nfaE, afaA, afaC, afaD, yfcV, iha, papC, traJ, papA_F9, ompT* | *kpsMII, kpsE* | *irp2, fyuA, iucC, iutA, sitA, chuA,* | *hlyA, nlpI, senB, AslA* | *ibeA, tia* | *iss* | *terC* |  | *dhaK, sat, vat* | *aaiA, vgrG, aatA, aec* | 0.925 |
| S18  (ST131) | *iha, ompT, fimH, yfcV* | *kpsE, kpsM11* | *iutA, iucC, irp2, fyuA, sitA, senB, chuA* | *AslA, nlpI, senB* | _ | *iss, traT* | *terC* | _ | *pic,* *sat, tsh, vat* | *aaiA, vgrG, aatA, aec* | 0.935 |
| E13  (ST69) | *papA, papC, eilA fimH, iha, lpfA, ompT, traJ, yfcV* | *kpsMII_K1, neuC* | *chuA, fyuA, irp2, sitA*, *ireA,*  *iucC, iutA* | *cea, senB, hlyE, cnf1, usp, nlpI* | *ibeA, tia* | *iss, traT* |  |  | *air, sat, tsh, vat* | *aaiA, aatA, vgrG, aec* | 0.926 |
| E25  (ST69) | *iha, traJ , fimH, papC, papA_F13, ompT, eilA, lpfA* | *kpsMII, kpsE* | *sitA, iucC, iutA, chuA* | *hlyE*, *nlpI, hlyA, cnf1* | *ibeA, tia* | *iss, traT* | *terC* | _ | *_air* | *aaiA, vgrG, aatA, aec* | 0.931 |
| K41  (ST69) | *traJ, iha, papC,* *papA_F13, fimH, eilA, lpfA, ompT* | *kpsE, kpsM11* | *sitA, iutA, iucC* | *hlyE, hlyA, cnf1, AslA, senB, nlpI* | *ibeA, tia* | *iss, traT* | *terC* | _ |  | *aaiA, vgrG, aatA, aec* | 0.932 |
| E17  (ST59) | *fimH, iha, yfcV, ompT* | *kpsMII_K1, kpsE, neuC* | *iucC*, *iutA*, *irp2*  *chuA*, *sitA,*  *fyuA* | *cea, senB, hlyE, cnf1, usp* | _ | *traT* |  | _ | *sat* | *aaiA, aatA, vgrG, aec* | 0.929 |
| E18  (ST10) | *iha, csgA, afaA, afaB, afaC, afaD, fimH* | *kpsE, neuC, kpsMII_K1,* | *sitA*, *irp2*, *iutA, fyuA, iucC* | *senB*, cnf1, *hlyE,, cea, astA, nlpI* | _ | *traT* | *terC* |  | *sat* | *aaiA, vgrG, aatA, aec* | 0.851 |
| S7  (ST10) | *fimH, csgA, iha* | _ | *iutA, iucC, irp2, ireA,*  *fyuA* | *hlyA, hlyE, senB, cnf1, nlpI* | _ | *_* | *terC* |  | *sigA* | *aaiA, vgrG, aatA, aec* | 0.929 |
| E21  (ST155) | *fimH, lfpA, cgsA, yehD* | _ | _ | *hlyE, nlpI* | _ | *traT* | *terC* | _ | _ | *aaiA, vgrG, aatA, aec* | 0.94 |
| AE1  (ST38) | *afaA*, *afaB, afaC, afaD*, *iha*, ompT, *papA_F13, papC*  *traJ, fimH, eilA* | *kpsE, kpsM11* | *irp2, fyuA, iucC, iutA, chuA, sitA* | *hlyA, hlyE, cnf1, nlpI* | _ | *iss, traT* | *terC* | _ | *sat* | *aaiA, vgrG, aatA, aec* | 0.924 |

Table S6. MGE associated with virulence genes in the *E. coli* isolates

| **Sample ID** | **Contig** | **Synteny of resistance genes and MGEs** | **Plasmid/chromosomal sequence with closest nucleotide homology (accession number)** |
| --- | --- | --- | --- |
| S18 | 26 | IS3:ISL3:::helicase::***iucA:iucB:iucC:iucD:iutA::sat***:transposase:IS30 | *E. coli* strain GN06098 chromosome, complete genome ([CP147616.1](https://www.ncbi.nlm.nih.gov/nucleotide/CP147616.1?report=genbank&log$=nucltop&blast_rank=1&RID=3RD69RCZ01N)) |
| 19 | ***fyuA:ybtE:ybtT:ybtU:irp1:irp2:ybtA:ybtP:ybtQ:ybtX:ybtS***:integrase: | *E. coli* strain 3385 chromosome, complete genome (CP029420.1) |
| 42 | ***senB***:IS91 | *E. coli* strain S1-CAM-04-C plasmid p1-S1-CAM-04-C, complete sequence CP145701.1) |
| 34 | integrase:type II toxin-antitoxin system antitoxin :IS1 | *E. coli* HP129 plasmid pHP129 DNA, complete sequence (LC520287.1) |
| S7 | 73 | IS100::***ireA***:transposase | *E. coli* strain RHBSTW-00673 chromosome, complete genome (CP056355.1) |
| K41 | 06 | ***KpsD***:***KpsE***:ISEc10:IS100:type IV toxin-antitoxin |  |
| E25 | 50 | ***hlyC:hlyA***:type I secretion system permease:hlyD:cnf1::IS3:IS66 | *E. coli* strain DA61218 chromosome, complete genome (CP061206.1) |
| 62 | ***iucA:iucB:iucC:iucD:iutA*** | *E. coli* strain TUM10008 plasmid pMTY10008_IncF, complete sequence (CP135659.1) |
| 32 | ***fyuA:ybtE:ybtT:ybtU:irp1:irp2:ybtA:ybtP:ybtQ:ybtX:ybtS***:integrase | *E. coli* strain MS 196-1 chromosome, complete genome CP146681.1 |
| 64 | IS110::transposase:***iha***:IS3 | *E. coli* strain MS20675 chromosome, complete genome (CP082056.1) |
| E18 | 90 | ***senB***:IS91 | *E. coli* VR50 plasmid pVR50B, complete sequence CP011136.1 |
| 59 | IS3::***iucA:iucB:iucC:iucD:iutA::sat***::IS3:transposase:IS110 | *E. coli* strain MS 196-1 chromosome, complete genome CP146681.1 |
| 63 | IS1::***neuB:neuC:neuD***:capsular biosynthesis protein | *E. coli* strain MS 196-1 chromosome, complete genome CP146681.1 |
| E17 | 29 | integrase:***ybtS:ybtX:ybtQ:ybtP:ybtA::irp2:irp1:ybtU:ybtT:ybtE:fyuA*** | *E. coli* strain SCU-172 chromosome, complete genome CP054353.1 |
| 97 | ***senB***:IS91:transposase | *E. coli* strain SCU-172 plasmid pSCU-172-2, complete sequence CP054355.1 |
| 81 | IS3:transposase::***iucA:iucB:iucC:iucD:iutA:sat*** | *E. coli* strain SCU-172 chromosome, complete genome CP054353.1 |
| E13 | 50 | ISEc45:ISEc43:IS66:::***sat::iutA:iucC:iucA***:::IS66 | *E. coli* strain MS 198-1 chromosome, complete genome CP146687.1 |
| 31 | IncFII:repA::hha::traX:tratI:traD::traT:traE:traB:traK:traL:traA:traY:relaxome | *E. coli* strain EC00606 plasmid pEC00606_5, complete sequence OP378610.1 |
| 110 | IS3::***iha***:transposase:::ISL3::IS3 | *E. coli* strain 2017C-4173W12 chromosome, complete genome CP030768.1 |
| 105 | ***senB***:IS91:transposase | *E. coli* strain S1-CAM-04-C plasmid p1-S1-CAM-04-C, complete sequence CP145701.1 |
| 28 | recombinase:***ybtS:ybtX:ybtQ:ybtP:ybtA:irp2:irp1:ybtU:ybtT:ybtE:fyuA***::VirB3 | *E. coli* strain GN06007 chromosome CP041522.1 |
| E4 | 20 | ***fyuA:ybtE:ybtT:ybtU:irp1:irp2:ybtA:ybtP:ybtQ:ybtX:ybtS***:integrase | *E. coli* strain 5-1 chromosome, complete genome (CP089445.1) |
| 22 | ***fimC::fimA:fimE:fimB***::ISEc53:***fimB***::ISEc52 | *E. coli* strain ESBL41 chromosome ( CP041581.1) |
| 35 | ISL3:::***iucA:iucB:iucC:iucD:iutA:sat***:trasposase:IS30 | *E. coli* strain GN06098 chromosome, complete genome CP147616.1 |
| 58 | IncFII:repA:anr:type I toxin-antitoxin | *E. coli* strain NMBU-W13E19 plasmid pNMBU-W13E19_01, (CP043407.1) |
| 48 | colicin::lipoprotein::***senB***::IS91 | *E. coli* strain EC190759 plasmid pEC190759_2, complete sequence CP142955.1 |
| E3 | 63 | ISL3:***pic***:IS256::adhesin | *E. coli* strain MS 16-3 chromosome, complete genome CP146667.1 |
| 78 | transposase:lysis:ISL3:::***iucA:iucB:iucC:iucD:iutA:sat***:transposase:IS30 | *E. coli* strain GN06098 chromosome, complete genome CP147616.1 |
| 75 | IS66::***faeJ:faeI:faeH::faeF:faeD****:*:::hha::IS1 | *E. coli* strain A41 chromosome, complete genome CP028735.1 |
| 70 | ISEc10:::toxin:type IV toxin-antitoxin system:::transposase | *E. coli* 55989 chromosome CP028304.1 |
| AE1 | 48 | IS3:***iha***:transposase:::IS110::IS3:IS600:IS30:transposase:***sat::iutA:iucD:iucC:iucB:iucA***::IS3 | *E. coli* strain F16EC0211 chromosome, complete genome CP088427.1 |
| 33 | hemolysin:::S66::IS3:::***hlyC:hlyA::hlyD*::cnf1**:IS3:IS66 | *E. coli* strain Ecol_656, complete genome CP018979.1 |
| E26 | 14 | ***ybtS:ybtX:ybtQ:ybtP:ybtA:irp2:irp1:ybtU:ybtT:ybtE:fyuA*** | *E. coli* strain ZH063, complete genome CP014522.1 |
| 42 | ***senB***:IS91:transposase | *E. coli* strain SCU-123 plasmid pSCU-123-1, complete sequence CP051712.1 |
| 33 | IS66:transposase:papX:***papG***:***papF***::***papJ***:::***papC***:***papH***::***papB***:*p****apI***:IS3::ISL3 | *E. coli* strain FDAARGOS_1293 chromosome, complete genome CP070041.1 |
| 31 | ISEc43:IS66:IS66::***sat:iutA:iucD:iucC:iucB:iucA***::::IS66 | *E. coli* strain DA33137 chromosome, complete genome CP029579.1 |
| 34 | ISEc53:parM::phage integrase protein:ccdB:ccdA::recombinase:::IS3 | *E. coli* strain ZH063 plasmid pZH063_1, complete sequence CP014523.1 |

**Table S7:***E. coli* genomes from African countries used in comparative phylogenomic analysis.

| **Genome ID** | **Genome Name** | **MLST** | **Collection Year** | **Isolation Country** |
| --- | --- | --- | --- | --- |
| 562.115446 | Escherichia coli E2258 | ST1193 | 2017.0 | Tanzania |
| 562.115447 | Escherichia coli E2163 | ST617 | 2017.0 | Tanzania |
| 562.115448 | Escherichia coli E2240 | ST1193 | 2017.0 | Tanzania |
| 562.115449 | Escherichia coli E2130 | ST1193 | 2017.0 | Tanzania |
| 562.11545 | Escherichia coli E2124 | ST617 | 2017.0 | Tanzania |
| 562.115451 | Escherichia coli E1779 | ST131 | 2017.0 | Tanzania |
| 562.115452 | Escherichia coli E2171 | ST410 | 2017.0 | Tanzania |
| 562.115453 | Escherichia coli E1637 | ST167 | 2017.0 | Tanzania |
| 562.115454 | Escherichia coli E1520 | ST131 | 2017.0 | Tanzania |
| 562.115455 | Escherichia coli E1253 | ST131 | 2017.0 | Tanzania |
| 562.115456 | Escherichia coli E1476 | ST617 | 2017.0 | Tanzania |
| 562.115457 | Escherichia coli E1448 | ST167 | 2017.0 | Tanzania |
| 562.115458 | Escherichia coli E1185 | ST617 | 2017.0 | Tanzania |
| 562.115459 | Escherichia coli E868 | ST4981 | 2017.0 | Tanzania |
| 562.11546 | Escherichia coli E453 | ST155 | 2017.0 | Tanzania |
| 562.115461 | Escherichia coli E451 | ST131 | 2017.0 | Tanzania |
| 562.115462 | Escherichia coli E415 | ST617 | 2017.0 | Tanzania |
| 562.123095 | Escherichia coli E407_Child | ST10 | 2017.0 | Tanzania |
| 562.126066 | Escherichia coli G_4814 | ST106 | 2017.0 | Nigeria |
| 562.128861 | Escherichia coli E822 | ST131 | 2017.0 | Tanzania |
| 562.129189 | Escherichia coli B_089 | ST101 | 2016.0 | Nigeria |
| 562.129191 | Escherichia coli G_2692 | ST410 | 2017.0 | Nigeria |
| 562.129453 | Escherichia coli B_071 | ST2480 | 2018.0 | Nigeria |
| 562.147952 | Escherichia coli MAKM028-2 | Unknown | 2022.0 | Uganda |
| 562.160423 | Escherichia coli 98192 | ST405 | Unknown | Egypt |
| 562.160441 | Escherichia coli 98210 | ST405 | Unknown | Egypt |
| 562.160445 | Escherichia coli 98202 | ST361 | Unknown | Egypt |
| 562.161152 | Escherichia coli 104 G7 | ST410 | 2016.0 | Reunion |
| 562.20529 | Escherichia coli strain ST-131:E062 | ST131 | 2013.0 | South Africa |
| 562.20532 | Escherichia coli strain E003 | ST744 | 2013.0 | South Africa |
| 562.20536 | Escherichia coli strain ST-648:K075 | ST648 | 2013.0 | South Africa |
| 562.21892 | Escherichia coli strain ST-131:E009 | ST131 | 2013.0 | South Africa |
| 562.21896 | Escherichia coli strain ST-131:E005 | ST131 | 2013.0 | South Africa |
| 562.48263 | Escherichia coli strain DASSIM7486973 | ST2083 | 2014.0 | Malawi |
| 562.63738 | Escherichia coli strain EC2033 | Unknown | 2018.0 | Tanzania |
| 562.67411 | Escherichia coli strain E21 | ST155 | 2018.0 | South Africa |
| 562.67412 | Escherichia coli strain E4 | ST131 | 2018.0 | South Africa |
| 562.67413 | Escherichia coli strain E18 | ST10 | 2017.0 | South Africa |
| 562.67414 | Escherichia coli strain E17 | ST59 | 2017.0 | South Africa |
| 562.67415 | Escherichia coli strain E26 | ST131 | 2018.0 | South Africa |
| 562.67416 | Escherichia coli strain E13 | ST69 | 2018.0 | South Africa |
| 562.67417 | Escherichia coli strain AE1 | ST38 | 2017.0 | South Africa |
| 562.67418 | Escherichia coli strain E25 | ST69 | 2017.0 | South Africa |
| 562.68465 | Escherichia coli strain S7 | ST10 | 2018.0 | South Africa |
| 562.68466 | Escherichia coli strain S18 | ST131 | 2018.0 | South Africa |
| 562.68467 | Escherichia coli strain K41 | ST69 | 2017.0 | South Africa |
| 562.68531 | Escherichia coli strain EC-1444 | ST216 | 2018.0 | Tanzania |
| 562.68764 | Escherichia coli strain EC-2026 | ST23 | 2018.0 | Tanzania |
| 562.79039 | Escherichia coli strain P31-31 | ST131 | 2017.0 | Malawi |
| 562.79046 | Escherichia coli strain P31-23 | ST410 | 2016.0 | Malawi |
| 941322.161 | Escherichia coli O25b:H4-ST131 strain P31-47 | ST131 | 2016.0 | Malawi |


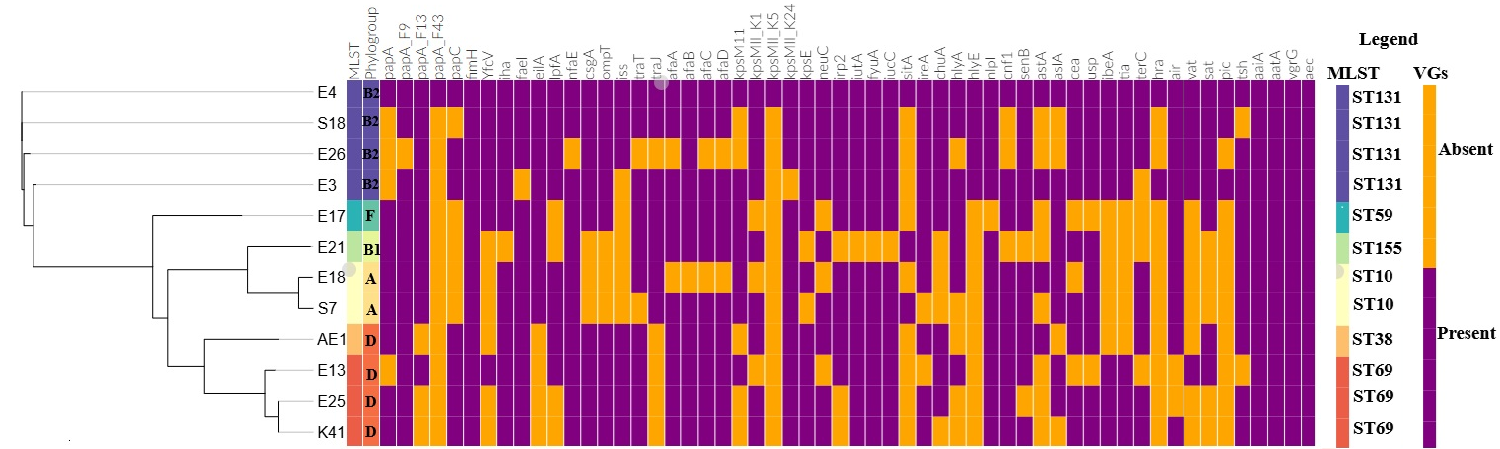


**Figure S1.** Phylogenetic clustering and virulence gene profiles of *E. coli* bloodstream isolates. The left panel displays the phylogenetic tree generated from virulence gene presence/absence data. Metadata columns indicate Multilocus sequence type (ST) and phylogroup. The central heatmap illustrates the distribution of virulence genes (VGs), with purple indicating gene presence and yellow indicating absence.
